# Supplementary material
Source: HighWire-hosted journal article supplement (https://www.cmaj.ca/content/suppl/2011/02/14/cmaj.090499)
Supplement: 49-50.pdf [file 49-50.pdf]

## DÉCISIONS

## Douleur testiculaire chez un jeune garçon

Stephen M. Graham MD, John M. Gatti MD

Publié précédemment dans [www.cmaj.ca](http://www.cmaj.ca)

Un garçon de 12 ans se présente chez un médecin de première ligne parce qu'il souffre depuis trois heures d'une douleur aiguë au côté droit du scrotum. À l'examen, le médecin constate de l'œdème, une rougeur et une très grande sensibilité de la région scrotale, ainsi qu'une absence de réflexe crémasterien du côté droit.

**Quels diagnostics envisager?**

Il faut d'abord envisager un diagnostic de torsion testiculaire, de torsion d'un appendice testiculaire ou d'épididymite<sup>1-3</sup>. D'autres diagnostics moins communs comprennent la présence d'une hernie ou d'une hydrocèle, de cellulite scrotale et d'un œdème idiopathique du scrotum<sup>1-3</sup> (encadré 1). La torsion testiculaire doit être détectée rapidement puisque les lésions ischémiques graves surviennent dans un intervalle d'à peine quatre à huit heures; pareilles lésions peuvent nuire à la production de sperme et réduire la viabilité du testicule<sup>4</sup>.

**Le patient souffre-t-il d'une torsion testiculaire?**

L'examen physique et les antécédents du patient fournissent les indices diagnostiques. Le temps compte : la plupart des patients souffrant d'une torsion testiculaire ou d'un appendice testiculaire (60 % à 70 %) consultent moins de 12 heures après l'apparition de la douleur; ce délai est supérieur à 12 heures chez les patients souffrant d'une épididymite<sup>3</sup>. Les antécédents du patient peuvent révéler des épisodes de douleur similaire dans les trois principaux diagnostics possibles. Des nausées et des vomissements accompagnent généralement la torsion testiculaire ou celle d'un appendice testiculaire, tandis que la dysurie et la fièvre sont communément associées à l'épididymite<sup>2,3</sup>.

Un hémiscrotum enflé et érythémateux peut être attribuable à trois causes, selon le temps écoulé depuis l'apparition des symptômes. Dans le cas d'une torsion testiculaire, la sensibilité est généralement diffuse et le testicule peut être en position horizontale ou élevée. Le réflexe crémasterien (déclenché par une légère pression de la partie supéromédiale de la cuisse pour détecter l'élévation du testicule ipsilatéral à l'intérieur du scrotum [réponse normale]) est un des prédicteurs les plus précis de torsion testiculaire; toutefois, son absence ou sa présence n'imposent pas à eux seuls un diagnostic<sup>2,3</sup>. Dans le cas de l'épididymite, la sensibilité se concentre souvent à l'épididyme; le réflexe crémasterien est généralement intact. La présence d'un « point bleu » – une masse bleue visible à travers la peau du scrotum et habituellement palpable dès le début – peut être détectée dans environ 23 % des cas de torsion de l'appendice testiculaire<sup>3</sup>.

**Encadré 1 : Diagnostic différentiel des cas de douleur testiculaire aiguë chez le garçon**

## Torsion :

- du cordon spermatique (torsion testiculaire)
- d'un appendice testiculaire
- de l'épididyme

## Infection :

- épididymite (virale ou bactérienne)
- orchite
- cellulite

## Trauma :

- contondant (p. ex. blessure sportive)
- agression sexuelle

## Autre :

- hernie
- hydrocèle
- tumeur testiculaire
- angéite (p. ex. syndrome de Schönlein-Henoch)
- épididymite non infectieuse ou chimique
- anomalie du canal déférent ou du canal éjaculateur
- œdème idiopathique du scrotum

**Quels sont les tests nécessaires?**

On peut devoir recourir à des tests supplémentaires lorsque les antécédents et les résultats de l'examen physique du patient ne permettent pas d'établir clairement le diagnostic (tableau 1). Des analyses d'urine révélant la présence de pyurie et de bactéries contribuent à déterminer un diagnostic d'épididymite, bien plus que l'une ou l'autre forme de torsion<sup>3</sup>. Il convient d'effectuer un prélèvement urétral aux fins d'analyse chez les hommes sexuellement actifs, surtout en présence d'écoulement urétral.

On recommande l'échographie Doppler haute résolution en couleurs, plutôt que l'imagerie isotopique, lorsque le patient souffre de douleur scrotale aiguë, en raison de sa plus grande disponibilité, de la courte durée de l'examen, de la possibilité d'évaluer le flux sanguin et du fait qu'on élimine ainsi l'exposition à la radiation ionisante. En général, les résultats de l'examen révèlent l'absence de flux sanguin dans un testicule plus gros, souvent hétérogène, propre aux cas de torsion testiculaire;

Service d'urologie (Graham), University of Kansas Medical Center, et Service de chirurgie pédiatrique (Gatti), Children's Mercy Hospitals and Clinics, Kansas City, É.-U.

**Tableau 1** : Guide de la douleur scrotale aiguë chez le garçon

| Diagnostic                          | Durée habituelle de la douleur avant l'examen, en heures | Région douloureuse                                                         | Résultats des analyses d'urine (pyurie ou bactéries ou les deux) | Résultats de l'échographie                                                           | Traitement*                                                            |
|-------------------------------------|----------------------------------------------------------|----------------------------------------------------------------------------|------------------------------------------------------------------|--------------------------------------------------------------------------------------|------------------------------------------------------------------------|
| Torsion testiculaire                | < 12                                                     | Testicule                                                                  | Négatifs                                                         | Absence de flux sanguin dans le testicule                                            | Adresser le patient à un urologue                                      |
| Torsion d'un appendice testiculaire | < 12                                                     | Concentrée à l'appendice (diagnostic précoce); diffuse (diagnostic tardif) | Négatifs                                                         | Flux sanguin normal à accru dans le testicule et appendice testiculaire plus gros    | AINS<br>Support scrotal et activité réduite                            |
| Épididymite                         | > 12                                                     | Épididyme                                                                  | Positifs                                                         | Flux sanguin normal à accru dans le testicule et flux sanguin accru dans l'épididyme | AINS<br>Support scrotal et activité réduite<br>Antibiotiques au besoin |

\*Note : AINS = anti-inflammatoire non stéroïdien.

un appendice légèrement plus gros (diagnostic précoce) ou un flux sanguin accru dans le testicule ou l'épididyme (diagnostic tardif) dans les cas de torsion de l'appendice testiculaire; enfin, un flux sanguin accru dans un épидидyme plus gros, souvent accompagné d'un épaississement de la paroi scrotale, dans les cas d'épididymite. Si elle accomplie par des mains expertes, l'échographie présente une sensibilité de 89,9 %, une spécificité de 98,8 % et un taux de faux négatifs de 1 %<sup>1</sup>.

Si les antécédents médicaux et les résultats de l'examen physique laissent présager un diagnostic de torsion testiculaire, il serait souhaitable de renoncer à l'échographie pour éviter de retarder la chirurgie exploratoire<sup>1</sup>. Il est impératif de diriger immédiatement à un chirurgien tout patient dont on présume qu'il souffre d'une torsion testiculaire.

### Quoi faire si le patient ne souffre pas d'une torsion testiculaire?

La gestion du traitement d'une épидидymite non bactérienne et d'une torsion d'un appendice testiculaire comprend la prise d'anti-inflammatoires non stéroïdiens (AINS), le port d'un support scrotal et la réduction de l'activité physique. En cas d'épididymite, on ne prescrit les antibiotiques que si les indices laissent fortement croire à une infection bactérienne (p. ex., la présence de pyurie ou de bactéries confirmée par une analyse d'urine, l'écoulement urétral)<sup>5</sup>. Le traitement des patients âgés de huit ans et plus souffrant potentiellement d'une épидидymite gonococcique ou à chlamydia comprend l'injection intramusculaire d'une dose de 250 mg de ceftriaxone et de 100 mg de doxycycline, deux fois par jour pendant sept jours. En revanche, on administre une dose de 500 mg de lévofloxacine, une fois par jour pendant 10 jours, aux patients dont le dépistage du gonocoque et l'amplification de l'acide nucléique donnent des résultats négatifs ou dont on attribue la maladie à un organisme entérique (*Escherichia coli*)<sup>6</sup>. On recommande aux patients souffrant d'une épi-

didymite ou d'une torsion de l'appendice testiculaire de téléphoner ou de consulter leur médecin si les symptômes s'intensifient ou perdurent pendant plus d'une semaine. En général, toutefois, la douleur associée à ces affections est spontanément résolutive.

### Retour sur le cas

L'urologue a été consulté en raison des indices de torsion testiculaire. Le patient était en salle d'opération dans l'heure suivante et l'exploration du scrotum a révélé un testicule droit ischémique présentant une déformation en battant de cloche (c.-à-d. un testicule attaché à un pédicule vasculaire librement suspendu). Le testicule a pu être sauvé par une détorsion manuelle (rotation du testicule pour dérouler le cordon spermatique) qui a permis de rétablir le flux sanguin. Le testicule a été attaché au scrotum à trois endroits, de même que le testicule collatéral, présentant lui aussi une déformation en battant de cloche, afin de prévenir sa torsion.

Cet article a fait l'objet d'une évaluation par des pairs.

**Intérêts conflictuels** : Aucun déclaré.

### RÉFÉRENCES

- Baker LA, Sigman D, Mathews RI, et coll. « An analysis of clinical outcomes using color Doppler testicular ultrasound for testicular torsion ». *Pediatrics* 2000; 105:604-7.
- Ciftci AO, Senocak ME, Tanyel FC, et coll. « Clinical predictors for differential diagnosis of acute scrotum ». *Eur J Pediatr Surg* 2004;14: 333-8.
- Kadish HA, Bolte RG. « A retrospective review of pediatric patients with epididymitis, testicular torsion, and torsion of testicular appendages ». *Pediatrics* 1998;102:73-6.
- Bartsch G, Frank S, Marberger H, et coll. « Testicular torsion: Late results with special regard to fertility and endocrine function ». *J Urol* 1980;124:375-8.
- Lau P, Anderson PA, Glacomantonio JM, et coll. « Acute epididymitis in boys: Are antibiotics indicated? ». *Br J Urol* 1997;79:797-800.
- Updated recommended treatment regimens for gonococcal infections and associated conditions — United States, avril 2007. Atlanta (GA) : Centers for Disease Control and Prevention, 2007. Disponible à : [www.healthandwelfare.idaho.gov/LinkClick.aspx?fileticket=bVN%2B6yP1tY%3D&tabid=179&mid=1460](http://www.healthandwelfare.idaho.gov/LinkClick.aspx?fileticket=bVN%2B6yP1tY%3D&tabid=179&mid=1460) (consulté le 5 février 2010).
